# Supplementary material
Source: PubMed Central journal article supplement (PMC5660867)
Supplement: NIHMS914614-supplement-Supporting_Information_File.pdf [file NIHMS914614-supplement-Supporting_Information_File.pdf]

Supporting Information for

## Polydopamine-Enabled Approach toward Tailored Plasmonic Nanogapped Nanoparticles: From Nanogap Engineering to Multifunctionality

Jiajing Zhou,<sup>†</sup> Qirong Xiong,<sup>†</sup> Jieli Ma,<sup>†</sup> Jinghua Ren,<sup>‡,\*</sup> Phillip B. Messersmith,<sup>§</sup> Peng Chen,<sup>†</sup> and Hongwei Duan<sup>†,\*</sup>

<sup>†</sup>School of Chemical and Biomedical Engineering, Nanyang Technological University, Singapore 637457.

<sup>‡</sup>Cancer Center, Union Hospital, Huazhong University of Science & Technology, Wuhan 430022, China

<sup>§</sup>Department of Bioengineering and Materials Science and Engineering, University of California, Berkeley, California 94720, United States.

E-mail: hduan@ntu.edu.sg; jhrenmed@hust.edu.cn.

## Materials and Characterization

Dopamine, sodium citrate, potassium gold(III) chloride ( $\text{KAuCl}_4$ ), bicine, hydroxylamine hydrochloride ( $\text{NH}_2\text{OH}\cdot\text{HCl}$ ), iron(III) chloride hexahydrate ( $\text{FeCl}_3\cdot 6\text{H}_2\text{O}$ ) iron(II) chloride ( $\text{FeCl}_2\cdot 4\text{H}_2\text{O}$ ), ammonium hydroxide, oleic acid, sodium dodecyl sulfate (SDS), styrene, tetradecane, potassium persulfate (KPS), zirconium(IV) chloride ( $\text{ZrCl}_4$ ), terephthalic acid ( $\text{H}_2\text{BDC}$ ), acetic acid, hexadecyltrimethylammonium bromide (CTAB), silver nitrate ( $\text{AgNO}_3$ ), sodium borohydride ( $\text{NaBH}_4$ ), 4-nitrothiophenol (NTP), and bovine serum albumin were purchased from Sigma Aldrich. Methanol (MeOH) and N,N-dimethylmethanamide (DMF) were obtained from Fisher Chemical. Hydrogen tetrachloroaurate(III) trihydrate ( $\text{HAuCl}_4\cdot 3\text{H}_2\text{O}$ ) was from Alfa Aesar. Ultrapure water ( $18.2\text{ M}\Omega\cdot\text{cm}$ ) was purified using a Sartorius AG arium system and used in all experiments. Methoxy-poly(ethylene glycol)-thiol (PEG-SH, 5 kDa) and carboxymethyl-poly(ethylene glycol)-thiol (HOOC-PEG-SH, 3.4 kDa) were purchased from Laysan Bio, Inc. Lissamine rhodamine B ethylenediamine (RhB-NH<sub>2</sub>) was purchased from Life Technologies. LIVE/DEAD<sup>®</sup> BacLight<sup>™</sup> Bacterial Viability Kits was purchased from Thermo Fisher Scientific. The pair of detection/capturing monoclonal antibodies (8B1-C2-B1 and 10C5-H3-B6) was obtained as a gift from Dr. Weihua Lai's group in Nanchang University.

Transmission electron microscopy (TEM) observations were conducted on a Jeol JEM 2010 electron microscope at an acceleration voltage of 300 kV. UV-vis spectra were recorded using a Shimadzu UV1800 spectrophotometer. Fluorescence spectra were collected on a Fluoromax-3 spectrometer (Horiba Scientific). Temperatures of solutions were obtained using FLIR T420 thermal imaging infrared camera. A RENISHAW Raman microscope with WIRE 2.0 software and 632.8 nm (maximum energy: 50 mW) emission line of an air-cooled He-Ne laser was used for SERS measurements. The laser beam with a laser spot size of 2–5  $\mu\text{m}$  was focused by a 50 $\times$  objective. A single scan with an integration time of 15 s was performed. The bacterial cells were imaged using laser scanning confocal microscopy (ZEISS LSM 800 with Airyscan).

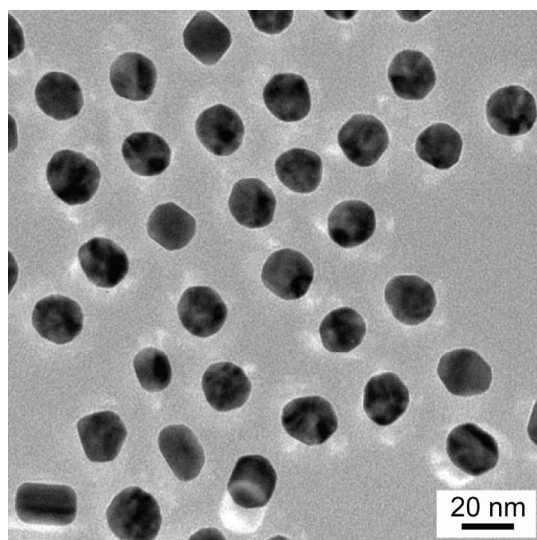

**Figure S1.** TEM image of 20 nm Au nanoparticles.

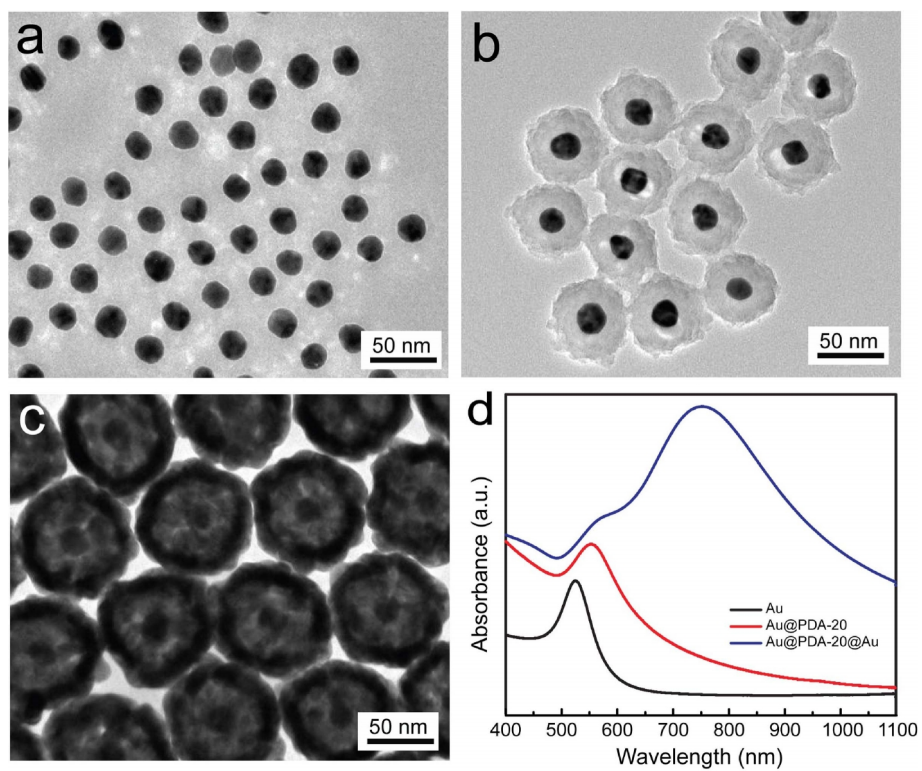

**Figure S2.** TEM images of 20 nm AuNP (a), Au@PDA-20 (b), and Au NNPs with a 20 nm nanogap. (c). UV-vis spectra of AuNP (black line), Au@PDA-20 (red line), and Au NNPs with a 20 nm nanogap (blue line).

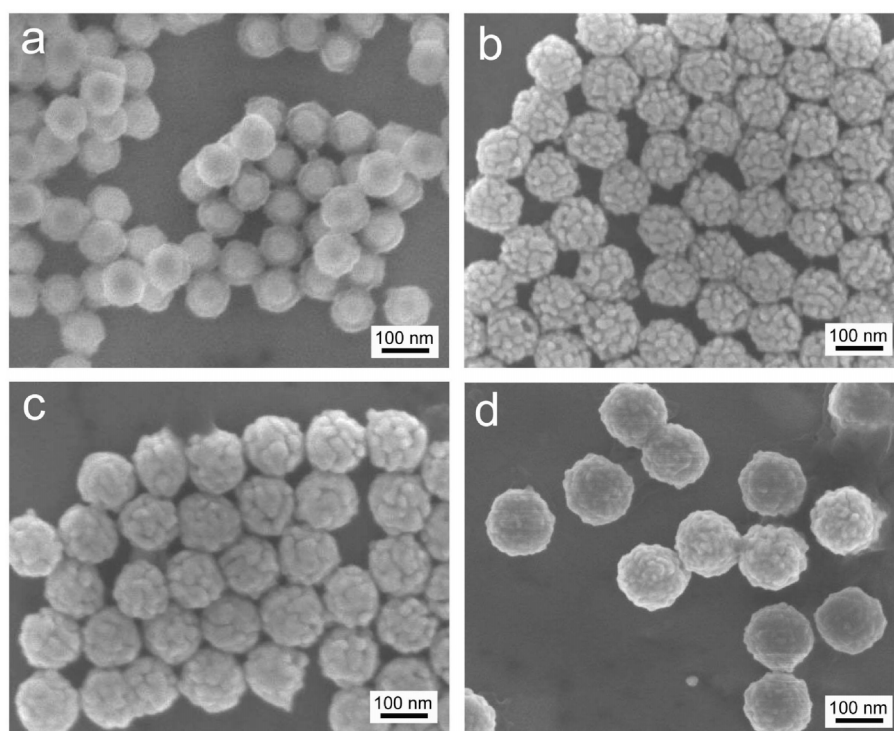

**Figure S3.** SEM images of the nanogapped nanoparticle at different amount of Au precursor: (a) 0 uL, (b) 25 uL, (b) 50 uL, (c) 80 uL.

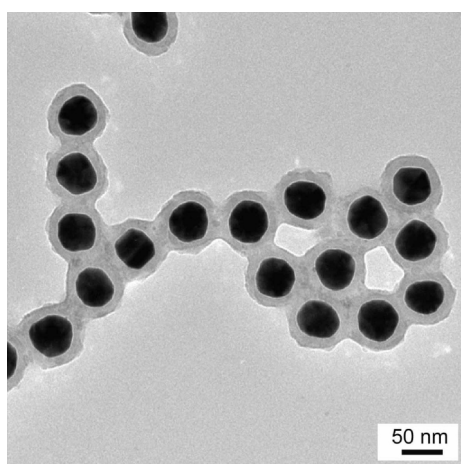

**Figure S4.** TEM image of Au(50nm)@PDA.

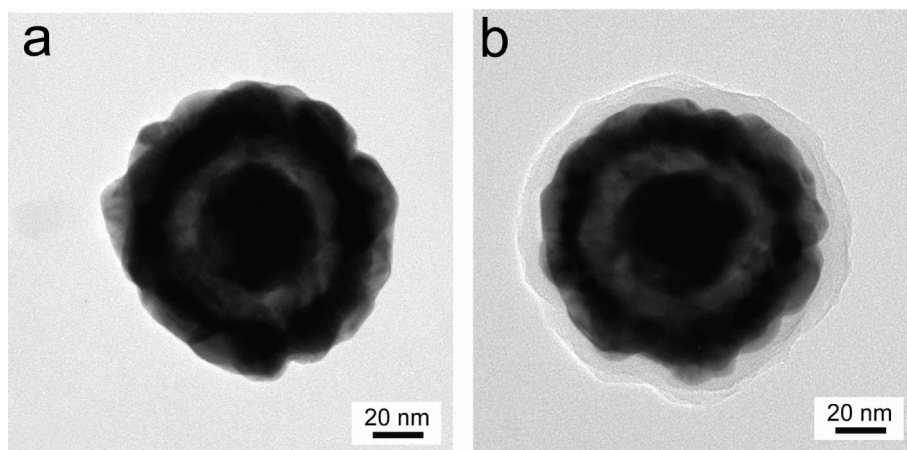

**Figure S5.** TEM images of Au(50nm)@PDA@Au and Au(50nm)@PDA@Au@PDA.

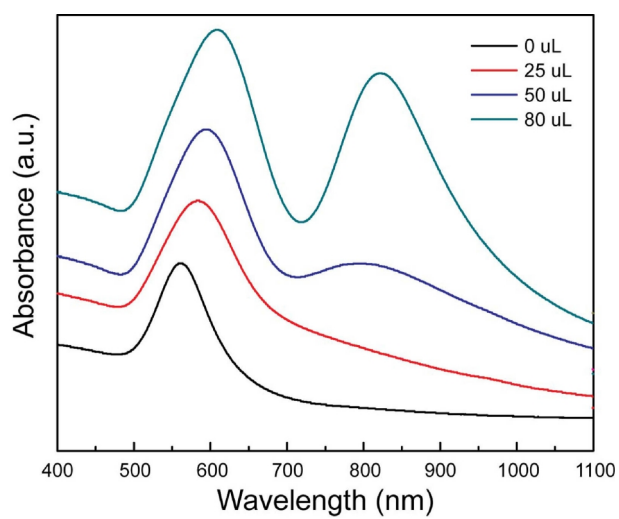

**Figure S6.** UV-vis spectra of Au nanogapped nanoparticle at different stage of growth.

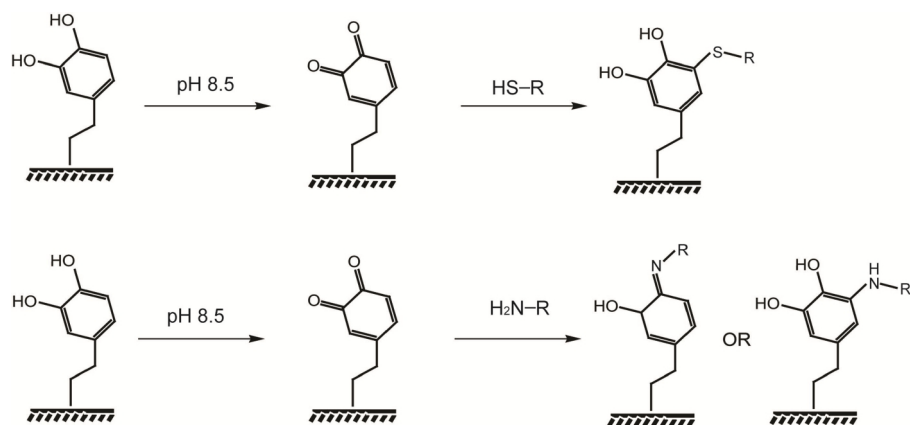

**Figure S7.** The PDA-coated nanoparticles conjugated with thiol and amine groups *via* Michael addition and/or Schiff base reaction.

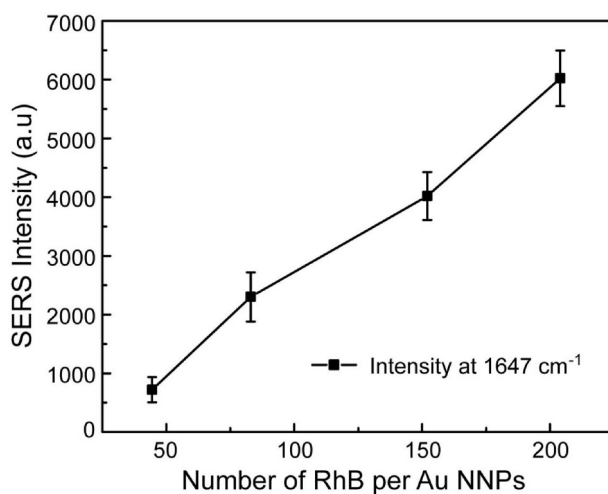

**Figure S8.** SERS intensity at 1647 cm<sup>-1</sup> as a function of the average number of RhB molecules loaded in each Au NNP.

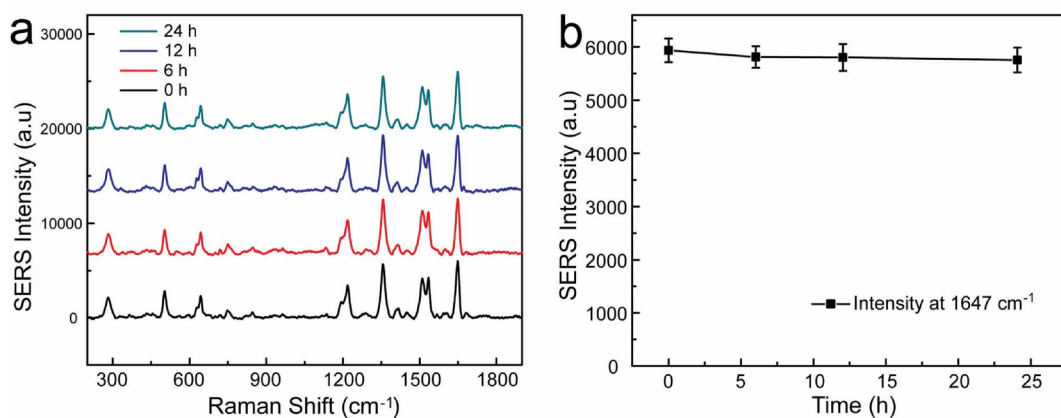

**Figure S9.** (a) SERS spectra of the as-prepared nanogapped nanoparticle dispersed in water at 0, 6, 12, and 24 h. (b) The time-dependent SERS intensity at  $1647\text{ cm}^{-1}$  during 24 h.

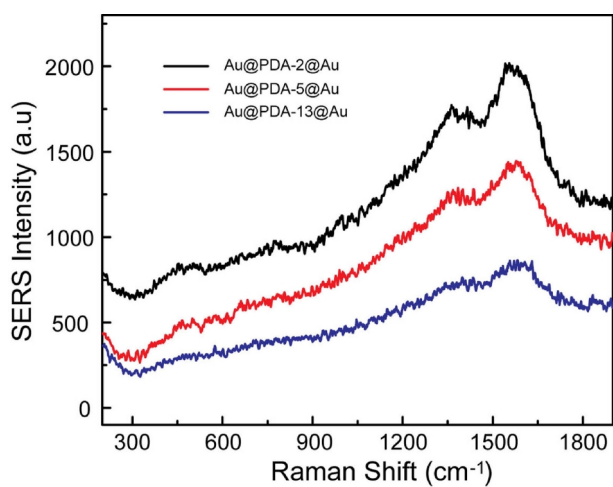

**Figure S10.** SERS spectra of different Au NNPs without Raman dyes.

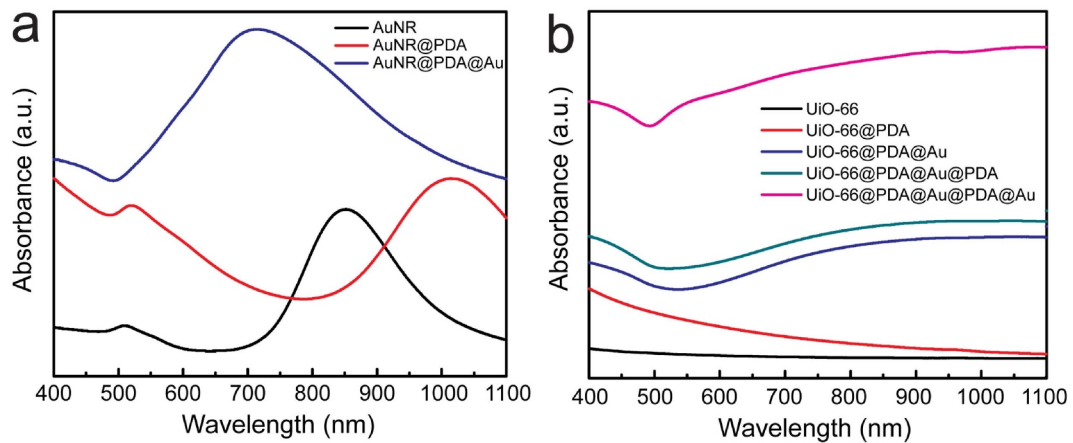

**Figure S11.** (a) UV–vis spectra of plasmonic AuNR NNPs at different stages. (b) UV–vis spectra of plasmonic UiO-66-cored NNPs at different stages.

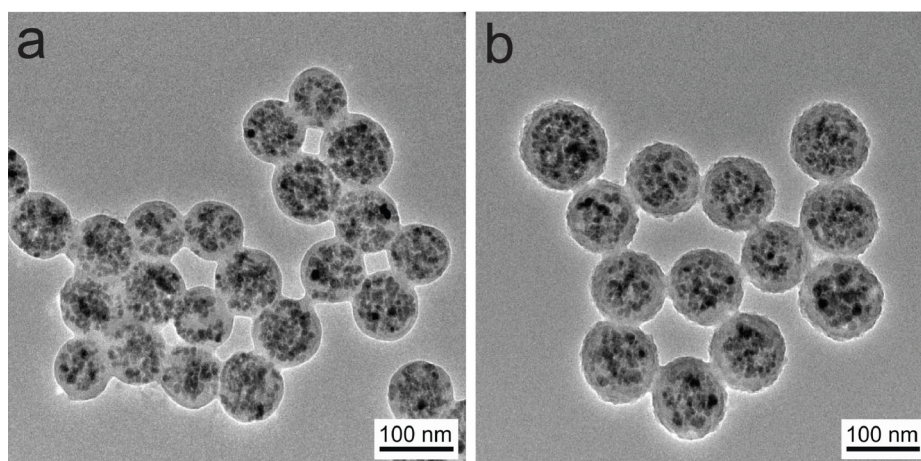

**Figure S12.** TEM images of MagNP (a) and MagNP@PDA (b).



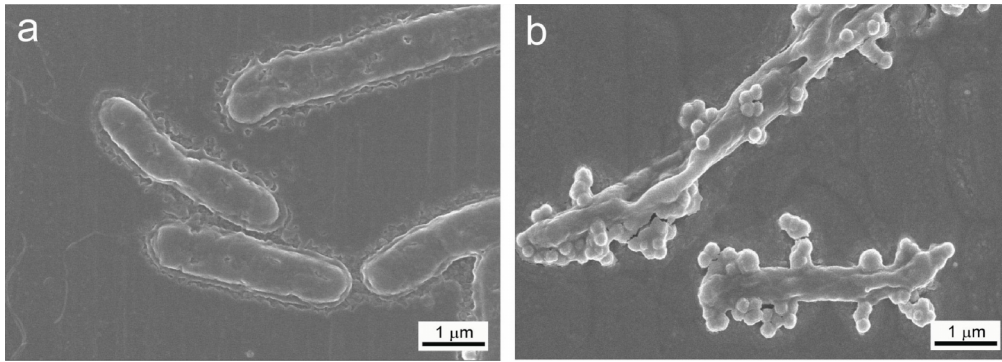

**Figure S13.** SEM images of *E. coli* O157:H7 before (a) and after (b) captured by magnetic NNPs.

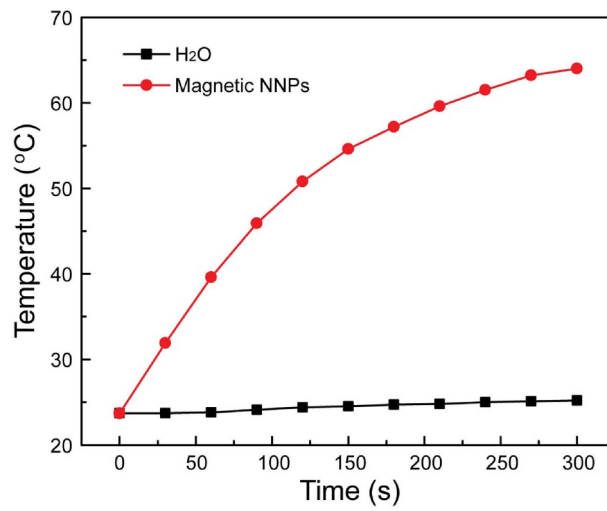

**Figure S14.** Photothermal conversion of magnetic NNPs exposed to an 808 nm laser ( $1 \text{ W/cm}^2$ ) at  $\text{OD}_{808 \text{ nm}}=1.5$ .

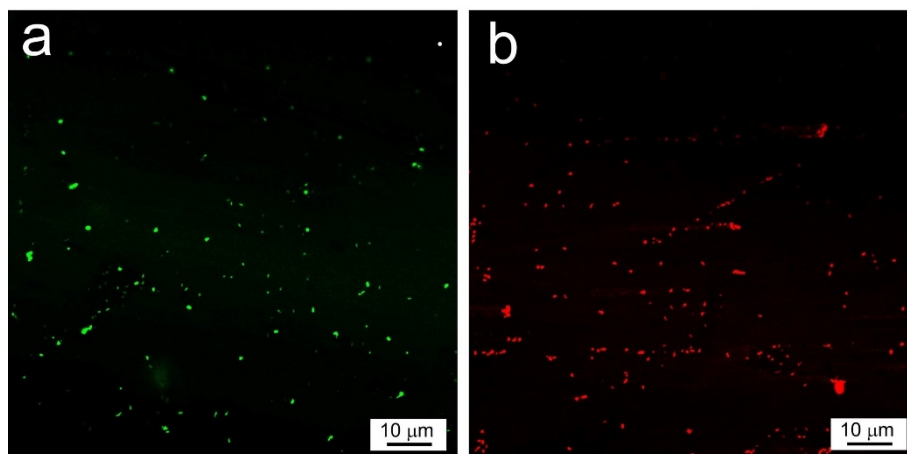

**Figure S15.** Fluorescence images of the captured bacteria before (a) and after (b) photothermal treatment by exposure to an 808 nm laser ( $1 \text{ W/cm}^2$ ) for 15 min.
